# Supplementary material for: MUSICA MetOp/IASI {H 2 O, δ D} pair retrieval simulations for validating tropospheric moisture pathways in atmospheric models
Source: Copernicus journal article supplement (doi:10.5194/amt-10-507-2017), 2017-02-13
Supplement: Supplementary file 1 [file amt-10-507-2017-supplement.zip]

Archive with 1,813 entries (1,211 files):
- readme.pdf
- amt-10-507-2017-supplement-title-page.pdf
- apri.dat
- regularisation/
- regularisation/inv_2950/
- regularisation/inv_2950/correl.inp
- regularisation/inv_2950/kovar.inp
- regularisation/inv_3750/
- regularisation/inv_3750/correl.inp
- regularisation/inv_3750/kovar.inp
- regularisation/inv_4520/
- regularisation/inv_4520/correl.inp
- regularisation/inv_4520/kovar.inp
- regularisation/inv_5190/
- regularisation/inv_5190/correl.inp
- regularisation/inv_5190/kovar.inp
- regularisation/inv_0340/
- regularisation/inv_0340/correl.inp
- regularisation/inv_0340/kovar.inp
- regularisation/inv_1550/
- regularisation/inv_1550/correl.inp
- regularisation/inv_1550/kovar.inp
- regularisation/inv_0360/
- regularisation/inv_0360/correl.inp
- regularisation/inv_0360/kovar.inp
- regularisation/inv_0430/
- regularisation/inv_0430/correl.inp
- regularisation/inv_0430/kovar.inp
- regularisation/inv_4640/
- regularisation/inv_4640/correl.inp
- regularisation/inv_4640/kovar.inp
- regularisation/inv_3950/
- regularisation/inv_3950/correl.inp
- regularisation/inv_3950/kovar.inp
- regularisation/inv_3340/
- regularisation/inv_3340/correl.inp
- regularisation/inv_3340/kovar.inp
- regularisation/inv_4980/
- regularisation/inv_4980/correl.inp
- regularisation/inv_4980/kovar.inp
- regularisation/inv_0560/
- regularisation/inv_0560/correl.inp
- regularisation/inv_0560/kovar.inp
- regularisation/inv_0220/
- regularisation/inv_0220/correl.inp
- regularisation/inv_0220/kovar.inp
- regularisation/inv_5540/
- regularisation/inv_5540/correl.inp
- regularisation/inv_5540/kovar.inp
- regularisation/inv_4680/
- regularisation/inv_4680/correl.inp
- regularisation/inv_4680/kovar.inp
- regularisation/inv_2780/
- regularisation/inv_2780/correl.inp
- regularisation/inv_2780/kovar.inp
- regularisation/inv_4000/
- regularisation/inv_4000/correl.inp
- regularisation/inv_4000/kovar.inp
- regularisation/inv_2030/
- regularisation/inv_2030/correl.inp
- regularisation/inv_2030/kovar.inp
- regularisation/inv_4200/
- regularisation/inv_4200/correl.inp
- regularisation/inv_4200/kovar.inp
- regularisation/inv_4150/
- regularisation/inv_4150/correl.inp
- regularisation/inv_4150/kovar.inp
- regularisation/inv_5930/
- regularisation/inv_5930/correl.inp
- regularisation/inv_5930/kovar.inp
- regularisation/inv_2450/
- regularisation/inv_2450/correl.inp
- regularisation/inv_2450/kovar.inp
- regularisation/inv_1530/
- regularisation/inv_1530/correl.inp
- regularisation/inv_1530/kovar.inp
- regularisation/inv_5310/
- regularisation/inv_5310/correl.inp
- regularisation/inv_5310/kovar.inp
- regularisation/inv_5500/
- regularisation/inv_5500/correl.inp
- regularisation/inv_5500/kovar.inp
- regularisation/inv_3280/
- regularisation/inv_3280/correl.inp
- regularisation/inv_3280/kovar.inp
- regularisation/inv_0180/
- regularisation/inv_0180/correl.inp
- regularisation/inv_0180/kovar.inp
- regularisation/inv_4570/
- regularisation/inv_4570/correl.inp
- regularisation/inv_4570/kovar.inp
- regularisation/inv_3270/
- regularisation/inv_3270/correl.inp
- regularisation/inv_3270/kovar.inp
- regularisation/inv_4650/
- regularisation/inv_4650/correl.inp
- regularisation/inv_4650/kovar.inp
- regularisation/inv_3680/
- regularisation/inv_3680/correl.inp
- regularisation/inv_3680/kovar.inp
- regularisation/inv_2080/
- regularisation/inv_2080/correl.inp
- regularisation/inv_2080/kovar.inp
- regularisation/inv_1350/
- regularisation/inv_1350/correl.inp
- regularisation/inv_1350/kovar.inp
- regularisation/inv_4500/
- regularisation/inv_4500/correl.inp
- regularisation/inv_4500/kovar.inp
- regularisation/inv_0670/
- regularisation/inv_0670/correl.inp
- regularisation/inv_0670/kovar.inp
- regularisation/inv_0410/
- regularisation/inv_0410/correl.inp
- regularisation/inv_0410/kovar.inp
- regularisation/inv_3790/
- regularisation/inv_3790/correl.inp
- regularisation/inv_3790/kovar.inp
- regularisation/inv_3960/
- regularisation/inv_3960/correl.inp
- regularisation/inv_3960/kovar.inp
- regularisation/inv_4140/
- regularisation/inv_4140/correl.inp
- regularisation/inv_4140/kovar.inp
- regularisation/inv_0550/
- regularisation/inv_0550/correl.inp
- regularisation/inv_0550/kovar.inp
- regularisation/inv_3420/
- regularisation/inv_3420/correl.inp
- regularisation/inv_3420/kovar.inp
- regularisation/inv_2770/
- regularisation/inv_2770/correl.inp
- regularisation/inv_2770/kovar.inp
- regularisation/inv_4390/
- regularisation/inv_4390/correl.inp
- regularisation/inv_4390/kovar.inp
- regularisation/inv_3830/
- regularisation/inv_3830/correl.inp
- regularisation/inv_3830/kovar.inp
- regularisation/inv_0500/
- regularisation/inv_0500/correl.inp
- regularisation/inv_0500/kovar.inp
- regularisation/inv_5610/
- regularisation/inv_5610/correl.inp
- regularisation/inv_5610/kovar.inp
- regularisation/inv_1910/
- regularisation/inv_1910/correl.inp
- regularisation/inv_1910/kovar.inp
- regularisation/inv_5530/
- regularisation/inv_5530/correl.inp
- regularisation/inv_5530/kovar.inp
- regularisation/inv_1460/
- regularisation/inv_1460/correl.inp
- regularisation/inv_1460/kovar.inp
- regularisation/inv_2560/
- regularisation/inv_2560/correl.inp
- regularisation/inv_2560/kovar.inp
- regularisation/inv_3200/
- regularisation/inv_3200/correl.inp
- regularisation/inv_3200/kovar.inp
- regularisation/inv_2960/
- regularisation/inv_2960/correl.inp
- regularisation/inv_2960/kovar.inp
- regularisation/inv_3330/
- regularisation/inv_3330/correl.inp
- regularisation/inv_3330/kovar.inp
- regularisation/inv_5070/
- regularisation/inv_5070/correl.inp
- regularisation/inv_5070/kovar.inp
- regularisation/inv_3800/
- regularisation/inv_3800/correl.inp
- regularisation/inv_3800/kovar.inp
- regularisation/inv_3360/
- regularisation/inv_3360/correl.inp
- regularisation/inv_3360/kovar.inp
- regularisation/inv_5710/
- regularisation/inv_5710/correl.inp
- regularisation/inv_5710/kovar.inp
- regularisation/inv_3860/
- regularisation/inv_3860/correl.inp
- regularisation/inv_3860/kovar.inp
- regularisation/inv_2720/
- regularisation/inv_2720/correl.inp
- regularisation/inv_2720/kovar.inp
- regularisation/inv_4480/
- regularisation/inv_4480/correl.inp
- regularisation/inv_4480/kovar.inp
- regularisation/inv_3040/
- regularisation/inv_3040/correl.inp
- regularisation/inv_3040/kovar.inp
- regularisation/inv_5990/
- regularisation/inv_5990/correl.inp
- regularisation/inv_5990/kovar.inp
- regularisation/inv_4010/
- regularisation/inv_4010/correl.inp
- regularisation/inv_4010/kovar.inp
- regularisation/inv_3590/
- regularisation/inv_3590/correl.inp
- regularisation/inv_3590/kovar.inp
- regularisation/inv_5300/
- regularisation/inv_5300/correl.inp
- regularisation/inv_5300/kovar.inp
- regularisation/inv_1930/
- regularisation/inv_1930/correl.inp
- regularisation/inv_1930/kovar.inp
- regularisation/inv_4990/
- regularisation/inv_4990/correl.inp
- regularisation/inv_4990/kovar.inp
- regularisation/inv_0540/
- regularisation/inv_0540/correl.inp
- regularisation/inv_0540/kovar.inp
- regularisation/inv_4380/
- regularisation/inv_4380/correl.inp
- regularisation/inv_4380/kovar.inp
- regularisation/inv_3490/
- regularisation/inv_3490/correl.inp
- regularisation/inv_3490/kovar.inp
- regularisation/inv_0130/
- regularisation/inv_0130/correl.inp
- regularisation/inv_0130/kovar.inp
- regularisation/inv_1120/
- regularisation/inv_1120/correl.inp
- regularisation/inv_1120/kovar.inp
- regularisation/inv_3760/
- regularisation/inv_3760/correl.inp
- regularisation/inv_3760/kovar.inp
- regularisation/inv_3930/
- regularisation/inv_3930/correl.inp
- regularisation/inv_3930/kovar.inp
- regularisation/inv_3560/
- regularisation/inv_3560/correl.inp
- regularisation/inv_3560/kovar.inp
- regularisation/inv_5160/
- regularisation/inv_5160/correl.inp
- regularisation/inv_5160/kovar.inp
- regularisation/inv_2010/
- regularisation/inv_2010/correl.inp
- regularisation/inv_2010/kovar.inp
- regularisation/inv_0640/
- regularisation/inv_0640/correl.inp
- regularisation/inv_0640/kovar.inp
- regularisation/inv_1540/
- regularisation/inv_1540/correl.inp
- regularisation/inv_1540/kovar.inp
- regularisation/inv_4900/
- regularisation/inv_4900/correl.inp
- regularisation/inv_4900/kovar.inp
- regularisation/inv_1250/
- regularisation/inv_1250/correl.inp
- regularisation/inv_1250/kovar.inp
- regularisation/inv_1200/
- regularisation/inv_1200/correl.inp
- regularisation/inv_1200/kovar.inp
- regularisation/inv_4460/
- regularisation/inv_4460/correl.inp
- regularisation/inv_4460/kovar.inp
- regularisation/inv_0420/
- regularisation/inv_0420/correl.inp
- regularisation/inv_0420/kovar.inp
- regularisation/inv_4530/
- regularisation/inv_4530/correl.inp
- regularisation/inv_4530/kovar.inp
- regularisation/inv_5520/
- regularisation/inv_5520/correl.inp
- regularisation/inv_5520/kovar.inp
- regularisation/inv_4400/
- regularisation/inv_4400/correl.inp
- regularisation/inv_4400/kovar.inp
- regularisation/inv_2060/
- regularisation/inv_2060/correl.inp
- regularisation/inv_2060/kovar.inp
- regularisation/inv_2250/
- regularisation/inv_2250/correl.inp
- regularisation/inv_2250/kovar.inp
- regularisation/inv_4130/
- regularisation/inv_4130/correl.inp
- regularisation/inv_4130/kovar.inp
- regularisation/inv_0480/
- regularisation/inv_0480/correl.inp
- regularisation/inv_0480/kovar.inp
- regularisation/inv_5480/
- regularisation/inv_5480/correl.inp
- regularisation/inv_5480/kovar.inp
- regularisation/inv_2430/
- regularisation/inv_2430/correl.inp
- regularisation/inv_2430/kovar.inp
- regularisation/inv_1500/
- regularisation/inv_1500/correl.inp
- regularisation/inv_1500/kovar.inp
- regularisation/inv_2880/
- regularisation/inv_2880/correl.inp
- regularisation/inv_2880/kovar.inp
- regularisation/inv_4610/
- regularisation/inv_4610/correl.inp
- regularisation/inv_4610/kovar.inp
- regularisation/inv_3810/
- regularisation/inv_3810/correl.inp
- regularisation/inv_3810/kovar.inp
- regularisation/inv_2660/
- regularisation/inv_2660/correl.inp
[truncated: 1,513 more entries]
