# Supplementary material for: MUSICA MetOp/IASI {H 2 O, δ D} pair retrieval simulations for validating tropospheric moisture pathways in atmospheric models
Source: Copernicus journal article supplement (doi:10.5194/amt-10-507-2017), 2017-02-13
Supplement: Supplementary file 1 [file amt-10-507-2017-supplement.zip › amt-10-507-2017-supplement-title-page.pdf]

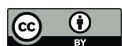

## *Supplement of*

# **MUSICA MetOp/IASI {H<sub>2</sub>O, $\delta$ D} pair retrieval simulations for validating tropospheric moisture pathways in atmospheric models**

**M. Schneider et al.**

*Correspondence to:* Matthias Schneider (matthias.schneider@kit.edu)

- amt-10-507-2017-supplement-title-page.pdf
- AVKsimulator.m
- AVKsimulator.py
- apri.dat
- example\_ECHAM5wiso\_20140212hh00.nc
- example\_output.dat
- readme.pdf
- regularisation
  - inv\_0000
    - \* correl.inp
    - \* kovar.inp
  - inv\_0010
    - \* correl.inp
    - \* kovar.inp
  - inv\_0020
    - \* correl.inp
    - \* kovar.inp
  - inv\_0030
    - \* correl.inp
    - \* kovar.inp
  - inv\_0040
    - \* correl.inp
    - \* kovar.inp

- inv\_0050
  - \* correl.inp
  - \* kovar.inp
- inv\_0060
  - \* correl.inp
  - \* kovar.inp
- inv\_0070
  - \* correl.inp
  - \* kovar.inp
- inv\_0080
  - \* correl.inp
  - \* kovar.inp
- inv\_0090
  - \* correl.inp
  - \* kovar.inp
- inv\_0100
  - \* correl.inp
  - \* kovar.inp
- inv\_0110
  - \* correl.inp
  - \* kovar.inp
- inv\_0120
  - \* correl.inp
  - \* kovar.inp
- inv\_0130
  - \* correl.inp
  - \* kovar.inp
- inv\_0140
  - \* correl.inp
  - \* kovar.inp
- inv\_0150
  - \* correl.inp
  - \* kovar.inp
- inv\_0160
  - \* correl.inp
  - \* kovar.inp
- inv\_0170
  - \* correl.inp
  - \* kovar.inp
- inv\_0180
  - \* correl.inp
  - \* kovar.inp
- inv\_0190
  - \* correl.inp

- \* kovar.inp
- inv\_0200
  - \* correl.inp
  - \* kovar.inp
- inv\_0210
  - \* correl.inp
  - \* kovar.inp
- inv\_0220
  - \* correl.inp
  - \* kovar.inp
- inv\_0230
  - \* correl.inp
  - \* kovar.inp
- inv\_0240
  - \* correl.inp
  - \* kovar.inp
- inv\_0250
  - \* correl.inp
  - \* kovar.inp
- inv\_0260
  - \* correl.inp
  - \* kovar.inp
- inv\_0270
  - \* correl.inp
  - \* kovar.inp
- inv\_0280
  - \* correl.inp
  - \* kovar.inp
- inv\_0290
  - \* correl.inp
  - \* kovar.inp
- inv\_0300
  - \* correl.inp
  - \* kovar.inp
- inv\_0310
  - \* correl.inp
  - \* kovar.inp
- inv\_0320
  - \* correl.inp
  - \* kovar.inp
- inv\_0330
  - \* correl.inp
  - \* kovar.inp
- inv\_0340

- \* correl.inp
  - \* kovar.inp
- inv\_0350
  - \* correl.inp
  - \* kovar.inp
- inv\_0360
  - \* correl.inp
  - \* kovar.inp
- inv\_0370
  - \* correl.inp
  - \* kovar.inp
- inv\_0380
  - \* correl.inp
  - \* kovar.inp
- inv\_0390
  - \* correl.inp
  - \* kovar.inp
- inv\_0400
  - \* correl.inp
  - \* kovar.inp
- inv\_0410
  - \* correl.inp
  - \* kovar.inp
- inv\_0420
  - \* correl.inp
  - \* kovar.inp
- inv\_0430
  - \* correl.inp
  - \* kovar.inp
- inv\_0440
  - \* correl.inp
  - \* kovar.inp
- inv\_0450
  - \* correl.inp
  - \* kovar.inp
- inv\_0460
  - \* correl.inp
  - \* kovar.inp
- inv\_0470
  - \* correl.inp
  - \* kovar.inp
- inv\_0480
  - \* correl.inp
  - \* kovar.inp

- inv\_0490
  - \* correl.inp
  - \* kovar.inp
- inv\_0500
  - \* correl.inp
  - \* kovar.inp
- inv\_0510
  - \* correl.inp
  - \* kovar.inp
- inv\_0520
  - \* correl.inp
  - \* kovar.inp
- inv\_0530
  - \* correl.inp
  - \* kovar.inp
- inv\_0540
  - \* correl.inp
  - \* kovar.inp
- inv\_0550
  - \* correl.inp
  - \* kovar.inp
- inv\_0560
  - \* correl.inp
  - \* kovar.inp
- inv\_0570
  - \* correl.inp
  - \* kovar.inp
- inv\_0580
  - \* correl.inp
  - \* kovar.inp
- inv\_0590
  - \* correl.inp
  - \* kovar.inp
- inv\_0600
  - \* correl.inp
  - \* kovar.inp
- inv\_0610
  - \* correl.inp
  - \* kovar.inp
- inv\_0620
  - \* correl.inp
  - \* kovar.inp
- inv\_0630
  - \* correl.inp

- \* kovar.inp
- inv\_0640
  - \* correl.inp
  - \* kovar.inp
- inv\_0650
  - \* correl.inp
  - \* kovar.inp
- inv\_0660
  - \* correl.inp
  - \* kovar.inp
- inv\_0670
  - \* correl.inp
  - \* kovar.inp
- inv\_0680
  - \* correl.inp
  - \* kovar.inp
- inv\_0690
  - \* correl.inp
  - \* kovar.inp
- inv\_0700
  - \* correl.inp
  - \* kovar.inp
- inv\_0710
  - \* correl.inp
  - \* kovar.inp
- inv\_0720
  - \* correl.inp
  - \* kovar.inp
- inv\_0730
  - \* correl.inp
  - \* kovar.inp
- inv\_0740
  - \* correl.inp
  - \* kovar.inp
- inv\_0750
  - \* correl.inp
  - \* kovar.inp
- inv\_0760
  - \* correl.inp
  - \* kovar.inp
- inv\_0770
  - \* correl.inp
  - \* kovar.inp
- inv\_0780

- \* correl.inp
  - \* kovar.inp
- inv\_0790
  - \* correl.inp
  - \* kovar.inp
- inv\_0800
  - \* correl.inp
  - \* kovar.inp
- inv\_0810
  - \* correl.inp
  - \* kovar.inp
- inv\_0820
  - \* correl.inp
  - \* kovar.inp
- inv\_0830
  - \* correl.inp
  - \* kovar.inp
- inv\_0840
  - \* correl.inp
  - \* kovar.inp
- inv\_0850
  - \* correl.inp
  - \* kovar.inp
- inv\_0860
  - \* correl.inp
  - \* kovar.inp
- inv\_0870
  - \* correl.inp
  - \* kovar.inp
- inv\_0880
  - \* correl.inp
  - \* kovar.inp
- inv\_0890
  - \* correl.inp
  - \* kovar.inp
- inv\_0900
  - \* correl.inp
  - \* kovar.inp
- inv\_0910
  - \* correl.inp
  - \* kovar.inp
- inv\_0920
  - \* correl.inp
  - \* kovar.inp

- inv\_0930
  - \* correl.inp
  - \* kovar.inp
- inv\_0940
  - \* correl.inp
  - \* kovar.inp
- inv\_0950
  - \* correl.inp
  - \* kovar.inp
- inv\_0960
  - \* correl.inp
  - \* kovar.inp
- inv\_0970
  - \* correl.inp
  - \* kovar.inp
- inv\_0980
  - \* correl.inp
  - \* kovar.inp
- inv\_0990
  - \* correl.inp
  - \* kovar.inp
- inv\_1000
  - \* correl.inp
  - \* kovar.inp
- inv\_1010
  - \* correl.inp
  - \* kovar.inp
- inv\_1020
  - \* correl.inp
  - \* kovar.inp
- inv\_1030
  - \* correl.inp
  - \* kovar.inp
- inv\_1040
  - \* correl.inp
  - \* kovar.inp
- inv\_1050
  - \* correl.inp
  - \* kovar.inp
- inv\_1060
  - \* correl.inp
  - \* kovar.inp
- inv\_1070
  - \* correl.inp

- \* kovar.inp
- inv\_1080
  - \* correl.inp
  - \* kovar.inp
- inv\_1090
  - \* correl.inp
  - \* kovar.inp
- inv\_1100
  - \* correl.inp
  - \* kovar.inp
- inv\_1110
  - \* correl.inp
  - \* kovar.inp
- inv\_1120
  - \* correl.inp
  - \* kovar.inp
- inv\_1130
  - \* correl.inp
  - \* kovar.inp
- inv\_1140
  - \* correl.inp
  - \* kovar.inp
- inv\_1150
  - \* correl.inp
  - \* kovar.inp
- inv\_1160
  - \* correl.inp
  - \* kovar.inp
- inv\_1170
  - \* correl.inp
  - \* kovar.inp
- inv\_1180
  - \* correl.inp
  - \* kovar.inp
- inv\_1190
  - \* correl.inp
  - \* kovar.inp
- inv\_1200
  - \* correl.inp
  - \* kovar.inp
- inv\_1210
  - \* correl.inp
  - \* kovar.inp
- inv\_1220

- \* correl.inp
  - \* kovar.inp
- inv\_1230
  - \* correl.inp
  - \* kovar.inp
- inv\_1240
  - \* correl.inp
  - \* kovar.inp
- inv\_1250
  - \* correl.inp
  - \* kovar.inp
- inv\_1260
  - \* correl.inp
  - \* kovar.inp
- inv\_1270
  - \* correl.inp
  - \* kovar.inp
- inv\_1280
  - \* correl.inp
  - \* kovar.inp
- inv\_1290
  - \* correl.inp
  - \* kovar.inp
- inv\_1300
  - \* correl.inp
  - \* kovar.inp
- inv\_1310
  - \* correl.inp
  - \* kovar.inp
- inv\_1320
  - \* correl.inp
  - \* kovar.inp
- inv\_1330
  - \* correl.inp
  - \* kovar.inp
- inv\_1340
  - \* correl.inp
  - \* kovar.inp
- inv\_1350
  - \* correl.inp
  - \* kovar.inp
- inv\_1360
  - \* correl.inp
  - \* kovar.inp

- inv\_1370
  - \* correl.inp
  - \* kovar.inp
- inv\_1380
  - \* correl.inp
  - \* kovar.inp
- inv\_1390
  - \* correl.inp
  - \* kovar.inp
- inv\_1400
  - \* correl.inp
  - \* kovar.inp
- inv\_1410
  - \* correl.inp
  - \* kovar.inp
- inv\_1420
  - \* correl.inp
  - \* kovar.inp
- inv\_1430
  - \* correl.inp
  - \* kovar.inp
- inv\_1440
  - \* correl.inp
  - \* kovar.inp
- inv\_1450
  - \* correl.inp
  - \* kovar.inp
- inv\_1460
  - \* correl.inp
  - \* kovar.inp
- inv\_1470
  - \* correl.inp
  - \* kovar.inp
- inv\_1480
  - \* correl.inp
  - \* kovar.inp
- inv\_1490
  - \* correl.inp
  - \* kovar.inp
- inv\_1500
  - \* correl.inp
  - \* kovar.inp
- inv\_1510
  - \* correl.inp

- \* kovar.inp
- inv\_1520
  - \* correl.inp
  - \* kovar.inp
- inv\_1530
  - \* correl.inp
  - \* kovar.inp
- inv\_1540
  - \* correl.inp
  - \* kovar.inp
- inv\_1550
  - \* correl.inp
  - \* kovar.inp
- inv\_1560
  - \* correl.inp
  - \* kovar.inp
- inv\_1570
  - \* correl.inp
  - \* kovar.inp
- inv\_1580
  - \* correl.inp
  - \* kovar.inp
- inv\_1590
  - \* correl.inp
  - \* kovar.inp
- inv\_1600
  - \* correl.inp
  - \* kovar.inp
- inv\_1610
  - \* correl.inp
  - \* kovar.inp
- inv\_1620
  - \* correl.inp
  - \* kovar.inp
- inv\_1630
  - \* correl.inp
  - \* kovar.inp
- inv\_1640
  - \* correl.inp
  - \* kovar.inp
- inv\_1650
  - \* correl.inp
  - \* kovar.inp
- inv\_1660

- \* correl.inp
  - \* kovar.inp
- inv\_1670
  - \* correl.inp
  - \* kovar.inp
- inv\_1680
  - \* correl.inp
  - \* kovar.inp
- inv\_1690
  - \* correl.inp
  - \* kovar.inp
- inv\_1700
  - \* correl.inp
  - \* kovar.inp
- inv\_1710
  - \* correl.inp
  - \* kovar.inp
- inv\_1720
  - \* correl.inp
  - \* kovar.inp
- inv\_1730
  - \* correl.inp
  - \* kovar.inp
- inv\_1740
  - \* correl.inp
  - \* kovar.inp
- inv\_1750
  - \* correl.inp
  - \* kovar.inp
- inv\_1760
  - \* correl.inp
  - \* kovar.inp
- inv\_1770
  - \* correl.inp
  - \* kovar.inp
- inv\_1780
  - \* correl.inp
  - \* kovar.inp
- inv\_1790
  - \* correl.inp
  - \* kovar.inp
- inv\_1800
  - \* correl.inp
  - \* kovar.inp

- inv\_1810
  - \* correl.inp
  - \* kovar.inp
- inv\_1820
  - \* correl.inp
  - \* kovar.inp
- inv\_1830
  - \* correl.inp
  - \* kovar.inp
- inv\_1840
  - \* correl.inp
  - \* kovar.inp
- inv\_1850
  - \* correl.inp
  - \* kovar.inp
- inv\_1860
  - \* correl.inp
  - \* kovar.inp
- inv\_1870
  - \* correl.inp
  - \* kovar.inp
- inv\_1880
  - \* correl.inp
  - \* kovar.inp
- inv\_1890
  - \* correl.inp
  - \* kovar.inp
- inv\_1900
  - \* correl.inp
  - \* kovar.inp
- inv\_1910
  - \* correl.inp
  - \* kovar.inp
- inv\_1920
  - \* correl.inp
  - \* kovar.inp
- inv\_1930
  - \* correl.inp
  - \* kovar.inp
- inv\_1940
  - \* correl.inp
  - \* kovar.inp
- inv\_1950
  - \* correl.inp

- \* kovar.inp
- inv\_1960
  - \* correl.inp
  - \* kovar.inp
- inv\_1970
  - \* correl.inp
  - \* kovar.inp
- inv\_1980
  - \* correl.inp
  - \* kovar.inp
- inv\_1990
  - \* correl.inp
  - \* kovar.inp
- inv\_2000
  - \* correl.inp
  - \* kovar.inp
- inv\_2010
  - \* correl.inp
  - \* kovar.inp
- inv\_2020
  - \* correl.inp
  - \* kovar.inp
- inv\_2030
  - \* correl.inp
  - \* kovar.inp
- inv\_2040
  - \* correl.inp
  - \* kovar.inp
- inv\_2050
  - \* correl.inp
  - \* kovar.inp
- inv\_2060
  - \* correl.inp
  - \* kovar.inp
- inv\_2070
  - \* correl.inp
  - \* kovar.inp
- inv\_2080
  - \* correl.inp
  - \* kovar.inp
- inv\_2090
  - \* correl.inp
  - \* kovar.inp
- inv\_2100

- \* correl.inp
  - \* kovar.inp
- inv\_2110
  - \* correl.inp
  - \* kovar.inp
- inv\_2120
  - \* correl.inp
  - \* kovar.inp
- inv\_2130
  - \* correl.inp
  - \* kovar.inp
- inv\_2140
  - \* correl.inp
  - \* kovar.inp
- inv\_2150
  - \* correl.inp
  - \* kovar.inp
- inv\_2160
  - \* correl.inp
  - \* kovar.inp
- inv\_2170
  - \* correl.inp
  - \* kovar.inp
- inv\_2180
  - \* correl.inp
  - \* kovar.inp
- inv\_2190
  - \* correl.inp
  - \* kovar.inp
- inv\_2200
  - \* correl.inp
  - \* kovar.inp
- inv\_2210
  - \* correl.inp
  - \* kovar.inp
- inv\_2220
  - \* correl.inp
  - \* kovar.inp
- inv\_2230
  - \* correl.inp
  - \* kovar.inp
- inv\_2240
  - \* correl.inp
  - \* kovar.inp

- inv\_2250
  - \* correl.inp
  - \* kovar.inp
- inv\_2260
  - \* correl.inp
  - \* kovar.inp
- inv\_2270
  - \* correl.inp
  - \* kovar.inp
- inv\_2280
  - \* correl.inp
  - \* kovar.inp
- inv\_2290
  - \* correl.inp
  - \* kovar.inp
- inv\_2300
  - \* correl.inp
  - \* kovar.inp
- inv\_2310
  - \* correl.inp
  - \* kovar.inp
- inv\_2320
  - \* correl.inp
  - \* kovar.inp
- inv\_2330
  - \* correl.inp
  - \* kovar.inp
- inv\_2340
  - \* correl.inp
  - \* kovar.inp
- inv\_2350
  - \* correl.inp
  - \* kovar.inp
- inv\_2360
  - \* correl.inp
  - \* kovar.inp
- inv\_2370
  - \* correl.inp
  - \* kovar.inp
- inv\_2380
  - \* correl.inp
  - \* kovar.inp
- inv\_2390
  - \* correl.inp

- \* kovar.inp
- inv\_2400
  - \* correl.inp
  - \* kovar.inp
- inv\_2410
  - \* correl.inp
  - \* kovar.inp
- inv\_2420
  - \* correl.inp
  - \* kovar.inp
- inv\_2430
  - \* correl.inp
  - \* kovar.inp
- inv\_2440
  - \* correl.inp
  - \* kovar.inp
- inv\_2450
  - \* correl.inp
  - \* kovar.inp
- inv\_2460
  - \* correl.inp
  - \* kovar.inp
- inv\_2470
  - \* correl.inp
  - \* kovar.inp
- inv\_2480
  - \* correl.inp
  - \* kovar.inp
- inv\_2490
  - \* correl.inp
  - \* kovar.inp
- inv\_2500
  - \* correl.inp
  - \* kovar.inp
- inv\_2510
  - \* correl.inp
  - \* kovar.inp
- inv\_2520
  - \* correl.inp
  - \* kovar.inp
- inv\_2530
  - \* correl.inp
  - \* kovar.inp
- inv\_2540

- \* correl.inp
  - \* kovar.inp
- inv\_2550
  - \* correl.inp
  - \* kovar.inp
- inv\_2560
  - \* correl.inp
  - \* kovar.inp
- inv\_2570
  - \* correl.inp
  - \* kovar.inp
- inv\_2580
  - \* correl.inp
  - \* kovar.inp
- inv\_2590
  - \* correl.inp
  - \* kovar.inp
- inv\_2600
  - \* correl.inp
  - \* kovar.inp
- inv\_2610
  - \* correl.inp
  - \* kovar.inp
- inv\_2620
  - \* correl.inp
  - \* kovar.inp
- inv\_2630
  - \* correl.inp
  - \* kovar.inp
- inv\_2640
  - \* correl.inp
  - \* kovar.inp
- inv\_2650
  - \* correl.inp
  - \* kovar.inp
- inv\_2660
  - \* correl.inp
  - \* kovar.inp
- inv\_2670
  - \* correl.inp
  - \* kovar.inp
- inv\_2680
  - \* correl.inp
  - \* kovar.inp

- inv\_2690
  - \* correl.inp
  - \* kovar.inp
- inv\_2700
  - \* correl.inp
  - \* kovar.inp
- inv\_2710
  - \* correl.inp
  - \* kovar.inp
- inv\_2720
  - \* correl.inp
  - \* kovar.inp
- inv\_2730
  - \* correl.inp
  - \* kovar.inp
- inv\_2740
  - \* correl.inp
  - \* kovar.inp
- inv\_2750
  - \* correl.inp
  - \* kovar.inp
- inv\_2760
  - \* correl.inp
  - \* kovar.inp
- inv\_2770
  - \* correl.inp
  - \* kovar.inp
- inv\_2780
  - \* correl.inp
  - \* kovar.inp
- inv\_2790
  - \* correl.inp
  - \* kovar.inp
- inv\_2800
  - \* correl.inp
  - \* kovar.inp
- inv\_2810
  - \* correl.inp
  - \* kovar.inp
- inv\_2820
  - \* correl.inp
  - \* kovar.inp
- inv\_2830
  - \* correl.inp

- \* kovar.inp
- inv\_2840
  - \* correl.inp
  - \* kovar.inp
- inv\_2850
  - \* correl.inp
  - \* kovar.inp
- inv\_2860
  - \* correl.inp
  - \* kovar.inp
- inv\_2870
  - \* correl.inp
  - \* kovar.inp
- inv\_2880
  - \* correl.inp
  - \* kovar.inp
- inv\_2890
  - \* correl.inp
  - \* kovar.inp
- inv\_2900
  - \* correl.inp
  - \* kovar.inp
- inv\_2910
  - \* correl.inp
  - \* kovar.inp
- inv\_2920
  - \* correl.inp
  - \* kovar.inp
- inv\_2930
  - \* correl.inp
  - \* kovar.inp
- inv\_2940
  - \* correl.inp
  - \* kovar.inp
- inv\_2950
  - \* correl.inp
  - \* kovar.inp
- inv\_2960
  - \* correl.inp
  - \* kovar.inp
- inv\_2970
  - \* correl.inp
  - \* kovar.inp
- inv\_2980

- \* correl.inp
  - \* kovar.inp
- inv\_2990
  - \* correl.inp
  - \* kovar.inp
- inv\_3000
  - \* correl.inp
  - \* kovar.inp
- inv\_3010
  - \* correl.inp
  - \* kovar.inp
- inv\_3020
  - \* correl.inp
  - \* kovar.inp
- inv\_3030
  - \* correl.inp
  - \* kovar.inp
- inv\_3040
  - \* correl.inp
  - \* kovar.inp
- inv\_3050
  - \* correl.inp
  - \* kovar.inp
- inv\_3060
  - \* correl.inp
  - \* kovar.inp
- inv\_3070
  - \* correl.inp
  - \* kovar.inp
- inv\_3080
  - \* correl.inp
  - \* kovar.inp
- inv\_3090
  - \* correl.inp
  - \* kovar.inp
- inv\_3100
  - \* correl.inp
  - \* kovar.inp
- inv\_3110
  - \* correl.inp
  - \* kovar.inp
- inv\_3120
  - \* correl.inp
  - \* kovar.inp

- inv\_3130
  - \* correl.inp
  - \* kovar.inp
- inv\_3140
  - \* correl.inp
  - \* kovar.inp
- inv\_3150
  - \* correl.inp
  - \* kovar.inp
- inv\_3160
  - \* correl.inp
  - \* kovar.inp
- inv\_3170
  - \* correl.inp
  - \* kovar.inp
- inv\_3180
  - \* correl.inp
  - \* kovar.inp
- inv\_3190
  - \* correl.inp
  - \* kovar.inp
- inv\_3200
  - \* correl.inp
  - \* kovar.inp
- inv\_3210
  - \* correl.inp
  - \* kovar.inp
- inv\_3220
  - \* correl.inp
  - \* kovar.inp
- inv\_3230
  - \* correl.inp
  - \* kovar.inp
- inv\_3240
  - \* correl.inp
  - \* kovar.inp
- inv\_3250
  - \* correl.inp
  - \* kovar.inp
- inv\_3260
  - \* correl.inp
  - \* kovar.inp
- inv\_3270
  - \* correl.inp

- \* kovar.inp
- inv\_3280
  - \* correl.inp
  - \* kovar.inp
- inv\_3290
  - \* correl.inp
  - \* kovar.inp
- inv\_3300
  - \* correl.inp
  - \* kovar.inp
- inv\_3310
  - \* correl.inp
  - \* kovar.inp
- inv\_3320
  - \* correl.inp
  - \* kovar.inp
- inv\_3330
  - \* correl.inp
  - \* kovar.inp
- inv\_3340
  - \* correl.inp
  - \* kovar.inp
- inv\_3350
  - \* correl.inp
  - \* kovar.inp
- inv\_3360
  - \* correl.inp
  - \* kovar.inp
- inv\_3370
  - \* correl.inp
  - \* kovar.inp
- inv\_3380
  - \* correl.inp
  - \* kovar.inp
- inv\_3390
  - \* correl.inp
  - \* kovar.inp
- inv\_3400
  - \* correl.inp
  - \* kovar.inp
- inv\_3410
  - \* correl.inp
  - \* kovar.inp
- inv\_3420

- \* correl.inp
  - \* kovar.inp
- inv\_3430
  - \* correl.inp
  - \* kovar.inp
- inv\_3440
  - \* correl.inp
  - \* kovar.inp
- inv\_3450
  - \* correl.inp
  - \* kovar.inp
- inv\_3460
  - \* correl.inp
  - \* kovar.inp
- inv\_3470
  - \* correl.inp
  - \* kovar.inp
- inv\_3480
  - \* correl.inp
  - \* kovar.inp
- inv\_3490
  - \* correl.inp
  - \* kovar.inp
- inv\_3500
  - \* correl.inp
  - \* kovar.inp
- inv\_3510
  - \* correl.inp
  - \* kovar.inp
- inv\_3520
  - \* correl.inp
  - \* kovar.inp
- inv\_3530
  - \* correl.inp
  - \* kovar.inp
- inv\_3540
  - \* correl.inp
  - \* kovar.inp
- inv\_3550
  - \* correl.inp
  - \* kovar.inp
- inv\_3560
  - \* correl.inp
  - \* kovar.inp

- inv\_3570
  - \* correl.inp
  - \* kovar.inp
- inv\_3580
  - \* correl.inp
  - \* kovar.inp
- inv\_3590
  - \* correl.inp
  - \* kovar.inp
- inv\_3600
  - \* correl.inp
  - \* kovar.inp
- inv\_3610
  - \* correl.inp
  - \* kovar.inp
- inv\_3620
  - \* correl.inp
  - \* kovar.inp
- inv\_3630
  - \* correl.inp
  - \* kovar.inp
- inv\_3640
  - \* correl.inp
  - \* kovar.inp
- inv\_3650
  - \* correl.inp
  - \* kovar.inp
- inv\_3660
  - \* correl.inp
  - \* kovar.inp
- inv\_3670
  - \* correl.inp
  - \* kovar.inp
- inv\_3680
  - \* correl.inp
  - \* kovar.inp
- inv\_3690
  - \* correl.inp
  - \* kovar.inp
- inv\_3700
  - \* correl.inp
  - \* kovar.inp
- inv\_3710
  - \* correl.inp

- \* kovar.inp
- inv\_3720
  - \* correl.inp
  - \* kovar.inp
- inv\_3730
  - \* correl.inp
  - \* kovar.inp
- inv\_3740
  - \* correl.inp
  - \* kovar.inp
- inv\_3750
  - \* correl.inp
  - \* kovar.inp
- inv\_3760
  - \* correl.inp
  - \* kovar.inp
- inv\_3770
  - \* correl.inp
  - \* kovar.inp
- inv\_3780
  - \* correl.inp
  - \* kovar.inp
- inv\_3790
  - \* correl.inp
  - \* kovar.inp
- inv\_3800
  - \* correl.inp
  - \* kovar.inp
- inv\_3810
  - \* correl.inp
  - \* kovar.inp
- inv\_3820
  - \* correl.inp
  - \* kovar.inp
- inv\_3830
  - \* correl.inp
  - \* kovar.inp
- inv\_3840
  - \* correl.inp
  - \* kovar.inp
- inv\_3850
  - \* correl.inp
  - \* kovar.inp
- inv\_3860

- \* correl.inp
  - \* kovar.inp
- inv\_3870
  - \* correl.inp
  - \* kovar.inp
- inv\_3880
  - \* correl.inp
  - \* kovar.inp
- inv\_3890
  - \* correl.inp
  - \* kovar.inp
- inv\_3900
  - \* correl.inp
  - \* kovar.inp
- inv\_3910
  - \* correl.inp
  - \* kovar.inp
- inv\_3920
  - \* correl.inp
  - \* kovar.inp
- inv\_3930
  - \* correl.inp
  - \* kovar.inp
- inv\_3940
  - \* correl.inp
  - \* kovar.inp
- inv\_3950
  - \* correl.inp
  - \* kovar.inp
- inv\_3960
  - \* correl.inp
  - \* kovar.inp
- inv\_3970
  - \* correl.inp
  - \* kovar.inp
- inv\_3980
  - \* correl.inp
  - \* kovar.inp
- inv\_3990
  - \* correl.inp
  - \* kovar.inp
- inv\_4000
  - \* correl.inp
  - \* kovar.inp

- inv\_4010
  - \* correl.inp
  - \* kovar.inp
- inv\_4020
  - \* correl.inp
  - \* kovar.inp
- inv\_4030
  - \* correl.inp
  - \* kovar.inp
- inv\_4040
  - \* correl.inp
  - \* kovar.inp
- inv\_4050
  - \* correl.inp
  - \* kovar.inp
- inv\_4060
  - \* correl.inp
  - \* kovar.inp
- inv\_4070
  - \* correl.inp
  - \* kovar.inp
- inv\_4080
  - \* correl.inp
  - \* kovar.inp
- inv\_4090
  - \* correl.inp
  - \* kovar.inp
- inv\_4100
  - \* correl.inp
  - \* kovar.inp
- inv\_4110
  - \* correl.inp
  - \* kovar.inp
- inv\_4120
  - \* correl.inp
  - \* kovar.inp
- inv\_4130
  - \* correl.inp
  - \* kovar.inp
- inv\_4140
  - \* correl.inp
  - \* kovar.inp
- inv\_4150
  - \* correl.inp

- \* kovar.inp
- inv\_4160
  - \* correl.inp
  - \* kovar.inp
- inv\_4170
  - \* correl.inp
  - \* kovar.inp
- inv\_4180
  - \* correl.inp
  - \* kovar.inp
- inv\_4190
  - \* correl.inp
  - \* kovar.inp
- inv\_4200
  - \* correl.inp
  - \* kovar.inp
- inv\_4210
  - \* correl.inp
  - \* kovar.inp
- inv\_4220
  - \* correl.inp
  - \* kovar.inp
- inv\_4230
  - \* correl.inp
  - \* kovar.inp
- inv\_4240
  - \* correl.inp
  - \* kovar.inp
- inv\_4250
  - \* correl.inp
  - \* kovar.inp
- inv\_4260
  - \* correl.inp
  - \* kovar.inp
- inv\_4270
  - \* correl.inp
  - \* kovar.inp
- inv\_4280
  - \* correl.inp
  - \* kovar.inp
- inv\_4290
  - \* correl.inp
  - \* kovar.inp
- inv\_4300

- \* correl.inp
  - \* kovar.inp
- inv\_4310
  - \* correl.inp
  - \* kovar.inp
- inv\_4320
  - \* correl.inp
  - \* kovar.inp
- inv\_4330
  - \* correl.inp
  - \* kovar.inp
- inv\_4340
  - \* correl.inp
  - \* kovar.inp
- inv\_4350
  - \* correl.inp
  - \* kovar.inp
- inv\_4360
  - \* correl.inp
  - \* kovar.inp
- inv\_4370
  - \* correl.inp
  - \* kovar.inp
- inv\_4380
  - \* correl.inp
  - \* kovar.inp
- inv\_4390
  - \* correl.inp
  - \* kovar.inp
- inv\_4400
  - \* correl.inp
  - \* kovar.inp
- inv\_4410
  - \* correl.inp
  - \* kovar.inp
- inv\_4420
  - \* correl.inp
  - \* kovar.inp
- inv\_4430
  - \* correl.inp
  - \* kovar.inp
- inv\_4440
  - \* correl.inp
  - \* kovar.inp

- inv\_4450
  - \* correl.inp
  - \* kovar.inp
- inv\_4460
  - \* correl.inp
  - \* kovar.inp
- inv\_4470
  - \* correl.inp
  - \* kovar.inp
- inv\_4480
  - \* correl.inp
  - \* kovar.inp
- inv\_4490
  - \* correl.inp
  - \* kovar.inp
- inv\_4500
  - \* correl.inp
  - \* kovar.inp
- inv\_4510
  - \* correl.inp
  - \* kovar.inp
- inv\_4520
  - \* correl.inp
  - \* kovar.inp
- inv\_4530
  - \* correl.inp
  - \* kovar.inp
- inv\_4540
  - \* correl.inp
  - \* kovar.inp
- inv\_4550
  - \* correl.inp
  - \* kovar.inp
- inv\_4560
  - \* correl.inp
  - \* kovar.inp
- inv\_4570
  - \* correl.inp
  - \* kovar.inp
- inv\_4580
  - \* correl.inp
  - \* kovar.inp
- inv\_4590
  - \* correl.inp

- \* kovar.inp
- inv\_4600
  - \* correl.inp
  - \* kovar.inp
- inv\_4610
  - \* correl.inp
  - \* kovar.inp
- inv\_4620
  - \* correl.inp
  - \* kovar.inp
- inv\_4630
  - \* correl.inp
  - \* kovar.inp
- inv\_4640
  - \* correl.inp
  - \* kovar.inp
- inv\_4650
  - \* correl.inp
  - \* kovar.inp
- inv\_4660
  - \* correl.inp
  - \* kovar.inp
- inv\_4670
  - \* correl.inp
  - \* kovar.inp
- inv\_4680
  - \* correl.inp
  - \* kovar.inp
- inv\_4690
  - \* correl.inp
  - \* kovar.inp
- inv\_4700
  - \* correl.inp
  - \* kovar.inp
- inv\_4710
  - \* correl.inp
  - \* kovar.inp
- inv\_4720
  - \* correl.inp
  - \* kovar.inp
- inv\_4730
  - \* correl.inp
  - \* kovar.inp
- inv\_4740

- \* correl.inp
  - \* kovar.inp
- inv\_4750
  - \* correl.inp
  - \* kovar.inp
- inv\_4760
  - \* correl.inp
  - \* kovar.inp
- inv\_4770
  - \* correl.inp
  - \* kovar.inp
- inv\_4780
  - \* correl.inp
  - \* kovar.inp
- inv\_4790
  - \* correl.inp
  - \* kovar.inp
- inv\_4800
  - \* correl.inp
  - \* kovar.inp
- inv\_4810
  - \* correl.inp
  - \* kovar.inp
- inv\_4820
  - \* correl.inp
  - \* kovar.inp
- inv\_4830
  - \* correl.inp
  - \* kovar.inp
- inv\_4840
  - \* correl.inp
  - \* kovar.inp
- inv\_4850
  - \* correl.inp
  - \* kovar.inp
- inv\_4860
  - \* correl.inp
  - \* kovar.inp
- inv\_4870
  - \* correl.inp
  - \* kovar.inp
- inv\_4880
  - \* correl.inp
  - \* kovar.inp

- inv\_4890
  - \* correl.inp
  - \* kovar.inp
- inv\_4900
  - \* correl.inp
  - \* kovar.inp
- inv\_4910
  - \* correl.inp
  - \* kovar.inp
- inv\_4920
  - \* correl.inp
  - \* kovar.inp
- inv\_4930
  - \* correl.inp
  - \* kovar.inp
- inv\_4940
  - \* correl.inp
  - \* kovar.inp
- inv\_4950
  - \* correl.inp
  - \* kovar.inp
- inv\_4960
  - \* correl.inp
  - \* kovar.inp
- inv\_4970
  - \* correl.inp
  - \* kovar.inp
- inv\_4980
  - \* correl.inp
  - \* kovar.inp
- inv\_4990
  - \* correl.inp
  - \* kovar.inp
- inv\_5000
  - \* correl.inp
  - \* kovar.inp
- inv\_5010
  - \* correl.inp
  - \* kovar.inp
- inv\_5020
  - \* correl.inp
  - \* kovar.inp
- inv\_5030
  - \* correl.inp

- \* kovar.inp
- inv\_5040
  - \* correl.inp
  - \* kovar.inp
- inv\_5050
  - \* correl.inp
  - \* kovar.inp
- inv\_5060
  - \* correl.inp
  - \* kovar.inp
- inv\_5070
  - \* correl.inp
  - \* kovar.inp
- inv\_5080
  - \* correl.inp
  - \* kovar.inp
- inv\_5090
  - \* correl.inp
  - \* kovar.inp
- inv\_5100
  - \* correl.inp
  - \* kovar.inp
- inv\_5110
  - \* correl.inp
  - \* kovar.inp
- inv\_5120
  - \* correl.inp
  - \* kovar.inp
- inv\_5130
  - \* correl.inp
  - \* kovar.inp
- inv\_5140
  - \* correl.inp
  - \* kovar.inp
- inv\_5150
  - \* correl.inp
  - \* kovar.inp
- inv\_5160
  - \* correl.inp
  - \* kovar.inp
- inv\_5170
  - \* correl.inp
  - \* kovar.inp
- inv\_5180

- \* correl.inp
  - \* kovar.inp
- inv\_5190
  - \* correl.inp
  - \* kovar.inp
- inv\_5200
  - \* correl.inp
  - \* kovar.inp
- inv\_5210
  - \* correl.inp
  - \* kovar.inp
- inv\_5220
  - \* correl.inp
  - \* kovar.inp
- inv\_5230
  - \* correl.inp
  - \* kovar.inp
- inv\_5240
  - \* correl.inp
  - \* kovar.inp
- inv\_5250
  - \* correl.inp
  - \* kovar.inp
- inv\_5260
  - \* correl.inp
  - \* kovar.inp
- inv\_5270
  - \* correl.inp
  - \* kovar.inp
- inv\_5280
  - \* correl.inp
  - \* kovar.inp
- inv\_5290
  - \* correl.inp
  - \* kovar.inp
- inv\_5300
  - \* correl.inp
  - \* kovar.inp
- inv\_5310
  - \* correl.inp
  - \* kovar.inp
- inv\_5320
  - \* correl.inp
  - \* kovar.inp

- inv\_5330
  - \* correl.inp
  - \* kovar.inp
- inv\_5340
  - \* correl.inp
  - \* kovar.inp
- inv\_5350
  - \* correl.inp
  - \* kovar.inp
- inv\_5360
  - \* correl.inp
  - \* kovar.inp
- inv\_5370
  - \* correl.inp
  - \* kovar.inp
- inv\_5380
  - \* correl.inp
  - \* kovar.inp
- inv\_5390
  - \* correl.inp
  - \* kovar.inp
- inv\_5400
  - \* correl.inp
  - \* kovar.inp
- inv\_5410
  - \* correl.inp
  - \* kovar.inp
- inv\_5420
  - \* correl.inp
  - \* kovar.inp
- inv\_5430
  - \* correl.inp
  - \* kovar.inp
- inv\_5440
  - \* correl.inp
  - \* kovar.inp
- inv\_5450
  - \* correl.inp
  - \* kovar.inp
- inv\_5460
  - \* correl.inp
  - \* kovar.inp
- inv\_5470
  - \* correl.inp

- \* kovar.inp
- inv\_5480
  - \* correl.inp
  - \* kovar.inp
- inv\_5490
  - \* correl.inp
  - \* kovar.inp
- inv\_5500
  - \* correl.inp
  - \* kovar.inp
- inv\_5510
  - \* correl.inp
  - \* kovar.inp
- inv\_5520
  - \* correl.inp
  - \* kovar.inp
- inv\_5530
  - \* correl.inp
  - \* kovar.inp
- inv\_5540
  - \* correl.inp
  - \* kovar.inp
- inv\_5550
  - \* correl.inp
  - \* kovar.inp
- inv\_5560
  - \* correl.inp
  - \* kovar.inp
- inv\_5570
  - \* correl.inp
  - \* kovar.inp
- inv\_5580
  - \* correl.inp
  - \* kovar.inp
- inv\_5590
  - \* correl.inp
  - \* kovar.inp
- inv\_5600
  - \* correl.inp
  - \* kovar.inp
- inv\_5610
  - \* correl.inp
  - \* kovar.inp
- inv\_5620

- \* correl.inp
  - \* kovar.inp
- inv\_5630
  - \* correl.inp
  - \* kovar.inp
- inv\_5640
  - \* correl.inp
  - \* kovar.inp
- inv\_5650
  - \* correl.inp
  - \* kovar.inp
- inv\_5660
  - \* correl.inp
  - \* kovar.inp
- inv\_5670
  - \* correl.inp
  - \* kovar.inp
- inv\_5680
  - \* correl.inp
  - \* kovar.inp
- inv\_5690
  - \* correl.inp
  - \* kovar.inp
- inv\_5700
  - \* correl.inp
  - \* kovar.inp
- inv\_5710
  - \* correl.inp
  - \* kovar.inp
- inv\_5720
  - \* correl.inp
  - \* kovar.inp
- inv\_5730
  - \* correl.inp
  - \* kovar.inp
- inv\_5740
  - \* correl.inp
  - \* kovar.inp
- inv\_5750
  - \* correl.inp
  - \* kovar.inp
- inv\_5760
  - \* correl.inp
  - \* kovar.inp

- inv\_5770
  - \* correl.inp
  - \* kovar.inp
- inv\_5780
  - \* correl.inp
  - \* kovar.inp
- inv\_5790
  - \* correl.inp
  - \* kovar.inp
- inv\_5800
  - \* correl.inp
  - \* kovar.inp
- inv\_5810
  - \* correl.inp
  - \* kovar.inp
- inv\_5820
  - \* correl.inp
  - \* kovar.inp
- inv\_5830
  - \* correl.inp
  - \* kovar.inp
- inv\_5840
  - \* correl.inp
  - \* kovar.inp
- inv\_5850
  - \* correl.inp
  - \* kovar.inp
- inv\_5860
  - \* correl.inp
  - \* kovar.inp
- inv\_5870
  - \* correl.inp
  - \* kovar.inp
- inv\_5880
  - \* correl.inp
  - \* kovar.inp
- inv\_5890
  - \* correl.inp
  - \* kovar.inp
- inv\_5900
  - \* correl.inp
  - \* kovar.inp
- inv\_5910
  - \* correl.inp

- \* kovar.inp
- inv\_5920
  - \* correl.inp
  - \* kovar.inp
- inv\_5930
  - \* correl.inp
  - \* kovar.inp
- inv\_5940
  - \* correl.inp
  - \* kovar.inp
- inv\_5950
  - \* correl.inp
  - \* kovar.inp
- inv\_5960
  - \* correl.inp
  - \* kovar.inp
- inv\_5970
  - \* correl.inp
  - \* kovar.inp
- inv\_5980
  - \* correl.inp
  - \* kovar.inp
- inv\_5990
  - \* correl.inp
  - \* kovar.inp
- inv\_6000
  - \* correl.inp
  - \* kovar.inp
- working\_example.m
- working\_example.py

The copyright of individual parts of the supplement might differ from the CC-BY 3.0 licence.
