# Supplementary material for: MUSICA MetOp/IASI {H 2 O, δ D} pair retrieval simulations for validating tropospheric moisture pathways in atmospheric models
Source: Copernicus journal article supplement (doi:10.5194/amt-10-507-2017), 2017-02-13
Supplement: Supplementary file 1 [file amt-10-507-2017-supplement.zip › apri.dat]

alt[m] H2O[ppmv] delD[unity] 
0 1.083e+04 -0.085
390 9.536e+03 -0.091
830 8.249e+03 -0.098
1300 7.059e+03 -0.106
1820 5.875e+03 -0.117
2370 4.805e+03 -0.129
2950 3.885e+03 -0.145
3570 3.090e+03 -0.163
4220 2.375e+03 -0.187
4900 1.770e+03 -0.216
5620 1.273e+03 -0.251
6380 8.755e+02 -0.288
7180 5.468e+02 -0.332
8010 2.994e+02 -0.384
8880 1.373e+02 -0.432
9780 6.363e+01 -0.458
10920 3.620e+01 -0.464
12000 2.122e+01 -0.465
13660 9.381e+00 -0.467
15960 4.337e+00 -0.467
18310 4.052e+00 -0.445
22100 4.574e+00 -0.384
26220 4.931e+00 -0.350
30690 5.285e+00 -0.350
36340 5.693e+00 -0.350
42370 5.972e+00 -0.350
48550 6.162e+00 -0.350
55600 6.008e+00 -0.349
